# Supplementary material
Source: Springer Nature journal article supplement (https://www.springermedizin.de/resource/supplementary/12889_2012_4946_MOESM2_ESM.pdf/9496346)

After defecation(%)

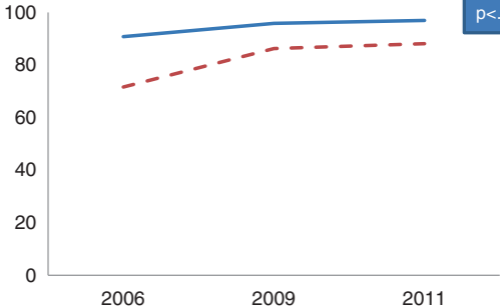

— Knowledge

- - Practice with soap

Supplement: MOESM2 [file 9496346]
